# Supplementary material
Source: publisher site journal article supplement (https://www.dovepress.com/get_supplementary_file.php?f=479039.docx)
Supplement: Supplementary file 1 [file get_supplementary_file.php]

Supplementary Table S1. Characteristics of GWAS enrolled in the MR study.

| **Items** | **Consortium** | **Sample size** | **No. of enrolled SNPs** | **Population** |
| --- | --- | --- | --- | --- |
| 25(OH)D | UK Biobank | 441291 | 16668957 | Europeans |
| Anemia | FinnGen | 115907 | 20134748 | Europeans |

GWAS: Genome-wide association study; MR: Mendelian randomization;SNP: single-nucleotide polymorphism; 25(OH)D: 25-Hydroxyvitamin D.

Supplementary Table S2. MR results of 25(OH)D on the risk of different types of anemia.

| **Exposure** | **Outcome** | **No. of SNPs** | **Method** | **OR (95% CI)** | ***P*-value** |
| --- | --- | --- | --- | --- | --- |
| 25(OH)D | Nutritional anemia | 99 | IVW | 0.83 (0.72~0.95) | 0.006 |
| Iron deficiency anemia | 99 | 0.79 (0.68~0.92) | 0.003 |
| Vitamin B12 deficiency anemia | 99 | 0.90 (0.68~1.20) | 0.466 |
| Acute hemorrhagic anemia | 99 | 0.98 (0.58~1.69) | 0.955 |
| Anemia in chronic disease | 99 | 0.66 (0.28~1.52) | 0.327 |
| Aplastic anemia | 99 | 0.89 (0.76~1.05) | 0.156 |
| Hemolytic anemia | 99 | 1.36 (0.73~2.56) | 0.333 |

SNP: single-nucleotide polymorphism; OR: odds ratio; CI: confidence interval; 25(OH)D: 25-Hydroxyvitamin D; IVW: inverse variance weighted.


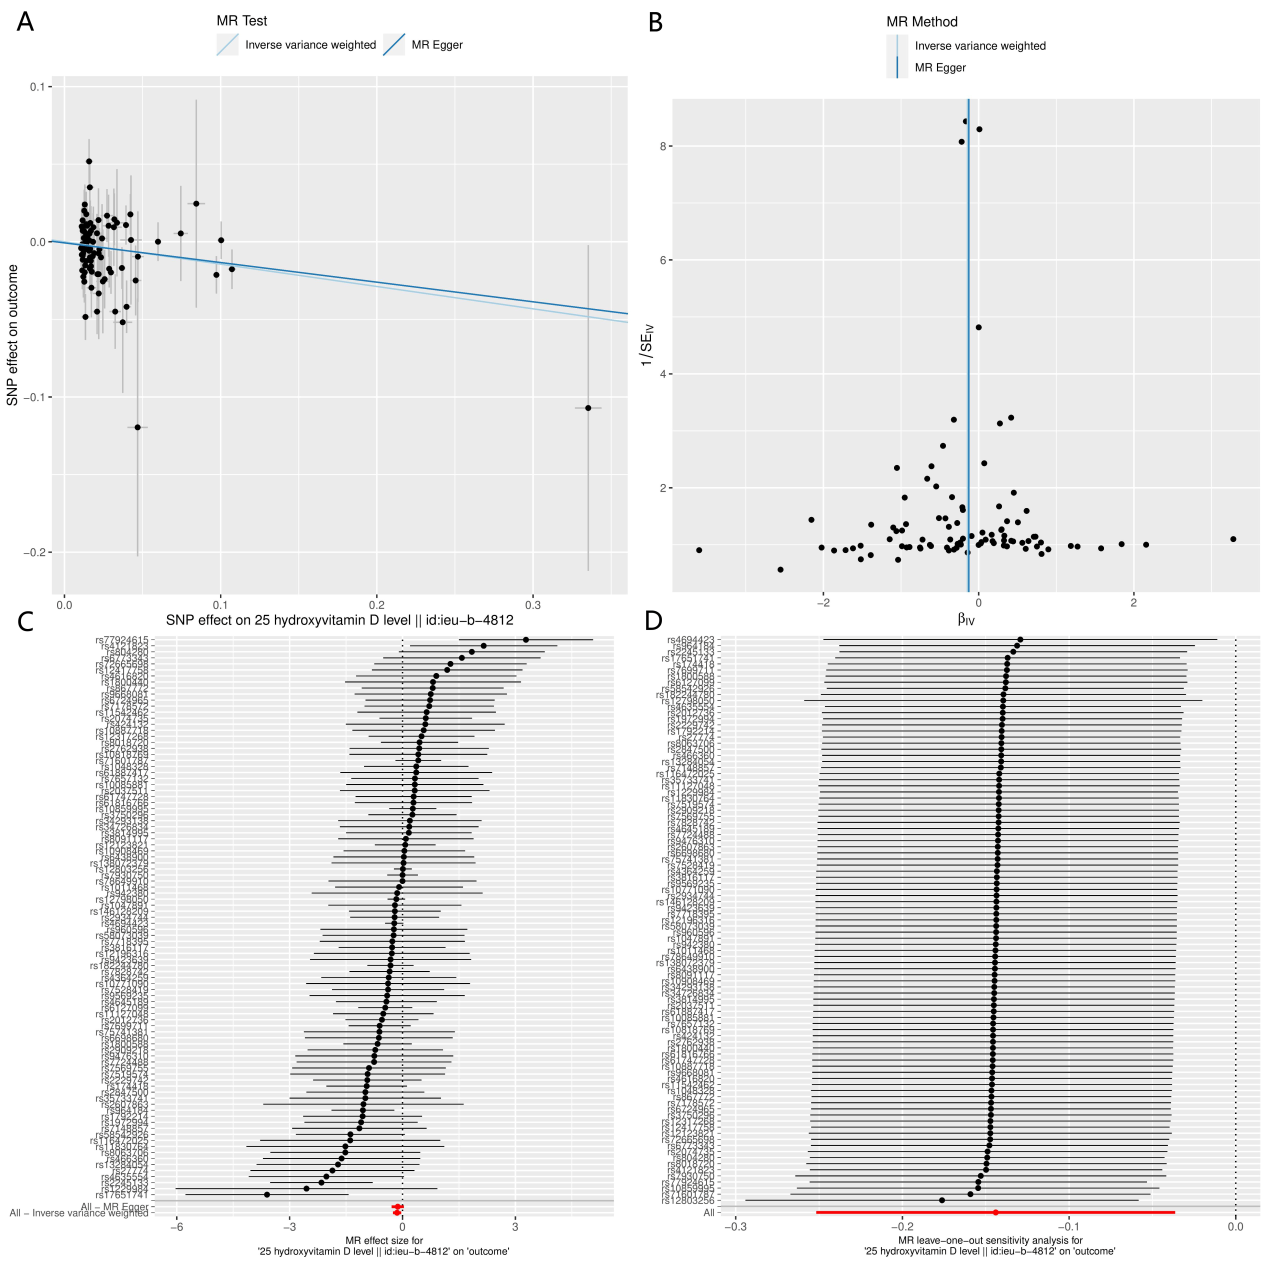


Supplementary Figure S1. Bidirectional MR of 25(OH)D on anemia in Europe population.

A. The relationship between anemia and 25(OH)D is represented via a scatter plot. For every approach, the causal relationship is represented by the slope of the line. The inverse-variance weighted estimate is shown by the blue line, while the Mendelian randomization-Egger estimate is represented by the dark blue line.

B. Analyze heterogeneity using a funnel plot. Dark blue line indicates Mendelian randomization-Egger estimate, and blue line indicates inverse-variance weighted estimate.

C. A forest plot illustrating the relationship between anemia and single nucleotide polymorphisms linked to 25(OH)D. The MR results of the MR-Egger test and the IVW method are the significance of the red lines.

D.Leave-one-out plot of 25(OH)D on anemia. The predicted IVW analysis value is shown by the bottom black line.
